# Supplementary material for: MAVS signaling is required for preventing persistent chikungunya heart infection and chronic vascular tissue inflammation
Source: PubMed Central journal article supplement (PMC10400619; doi:10.1038/s41467-023-40047-w), 2023-08-03
Supplement: 41467_2023_40047_MOESM1_ESM.pdf [file 41467_2023_40047_MOESM1_ESM.pdf]

**MAVS signaling is required for preventing persistent chikungunya heart infection and chronic vascular tissue inflammation**

Maria G. Noval<sup>1,7</sup>, Sophie N. Spector<sup>1</sup>, Eric Bartnicki<sup>1</sup>, Franco Izzo<sup>2,3</sup>, Navneet Narula<sup>4</sup>, Stephen T. Yeung<sup>1</sup>, Payal Damani-Yokota<sup>1</sup>, M. Zahidunnabi Dewan<sup>4</sup>, Valeria Mezzano<sup>4</sup>, Bruno A. Rodriguez-Rodriguez<sup>1</sup>, Cynthia Loomis<sup>4,5</sup>, Kamal M. Khanna<sup>1,6</sup>, and Kenneth A. Stapleford<sup>1,7</sup>

<sup>1</sup>Department of Microbiology, New York University Grossman School of Medicine, New York, NY, USA

<sup>2</sup>New York Genome Center, New York, NY, USA

<sup>3</sup>Division of Hematology and Medical Oncology, Department of Medicine and Meyer Cancer Center, Weill Cornell Medicine, New York, NY, USA

<sup>4</sup>Department of Pathology, New York University Grossman School of Medicine, New York, NY, USA

<sup>5</sup>Division of Advanced Research Technologies, New York University Grossman School of Medicine, New York, NY, USA

<sup>6</sup>Perlmutter Cancer Center, New York University Grossman School of Medicine, New York, NY, USA

<sup>7</sup>These authors jointly supervised this work: Maria G. Noval. [maria.noval@nyulangone.org](mailto:maria.noval@nyulangone.org) and Kenneth A. Stapleford. [kenneth.stapleford@nyulangone.org](mailto:kenneth.stapleford@nyulangone.org)

## Supplementary Fig.1. (Related to Fig. 1)

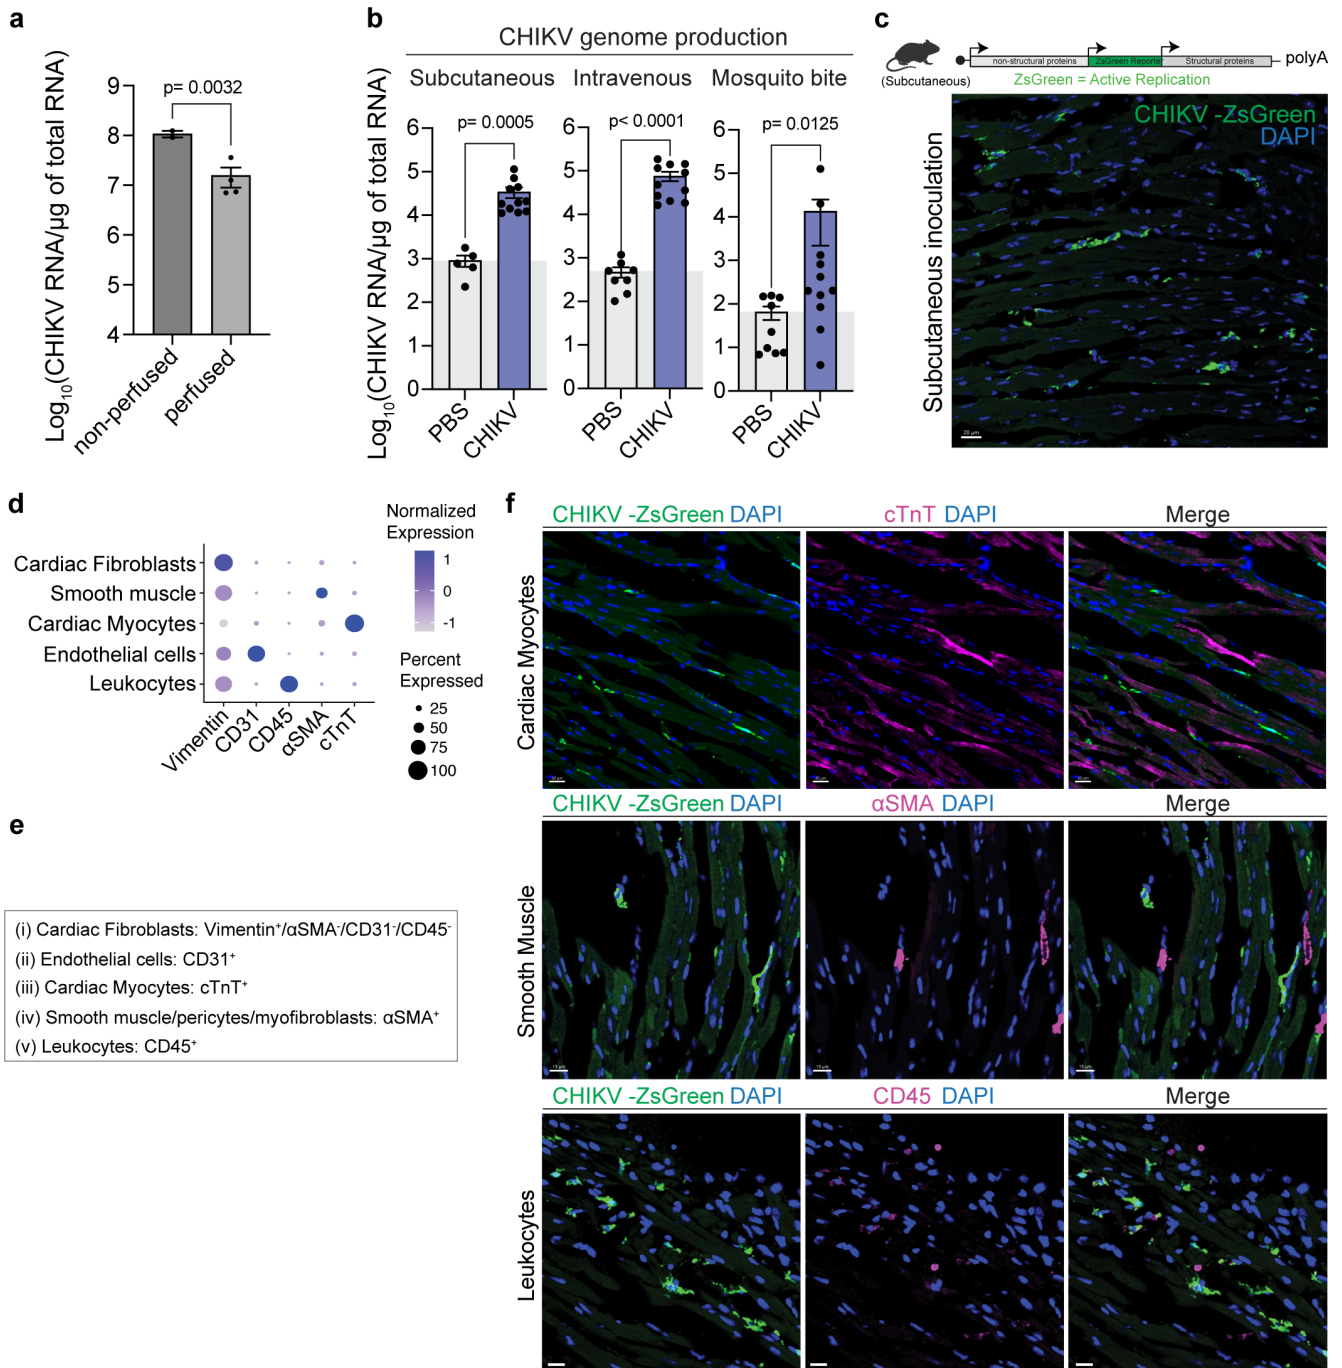

**Supplementary Fig. 1, related to Fig. 1.** **a.** *Ifnar1*<sup>-/-</sup> mice were infected intravenously with 1E2 PFU of CHIKV and harvested at 2 dpi. Animals were either perfused with more than 20 mL of PBS (perfused) or left untreated (non-perfused). Viral RNA was extracted from cardiac tissue homogenates and CHIKV genomes were quantified by RT-qPCR. Non-perfused (n=2), and perfused (n=4). Data from 1 independent experiment is represented as mean  $\pm$  SEM. P value was determined two-tailed unpaired t-test. **b.** Six-week-old C57BL/6 mice were inoculated with 1E5 PFU of CHIKV or mock-infected (PBS) subcutaneously, intravenously, or via natural transmission through a mosquito bite. Mice were harvested at 2 dpi for subcutaneous and intravenous infection routes, and at 2 and 3 dpi for mice infected through mosquito bite. Animals were perfused with 30 ml of cold PBS. Viral RNA genomes in heart tissue were quantified using RT-qPCR. Data from 3 independent experiments are represented as mean  $\pm$  SEM. For subcutaneous inoculation: CHIKV-infected (n=11) and mock-infected (n=5). Intravenous inoculation: CHIKV-infected (n=11) and mock-infected (n=8). Mosquito bite: CHIKV-infected (n=11) and mock-infected (n=9). p values were calculated using two-tailed Mann Whitney test. The gray box represents the background RNA levels determined for mock-infected controls. **c.** Mice were inoculated subcutaneously with 1E5 PFU of reporter CHIKV-ZsGreen or PBS-control. Scale= 20  $\mu$ m. Blue channel: DAPI. Green channel: CHIKV-infected cells. **d.** Dot plot showing the expression levels of the markers used in the study by cardiac cell type using the *Tabula Muris* data set. **e.** Strategy for cell-type identification. **f.** Representative fluorescence microscopy images from 3 independent experiments of ventricular sections of CHIKV-infected hearts stained with different cardiac cell type markers. Cardiac myocytes (Scale= 20  $\mu$ m), smooth muscle and leukocytes (Scale= 15  $\mu$ m). Created with BioRender.com. Source data are provided as a source data file.

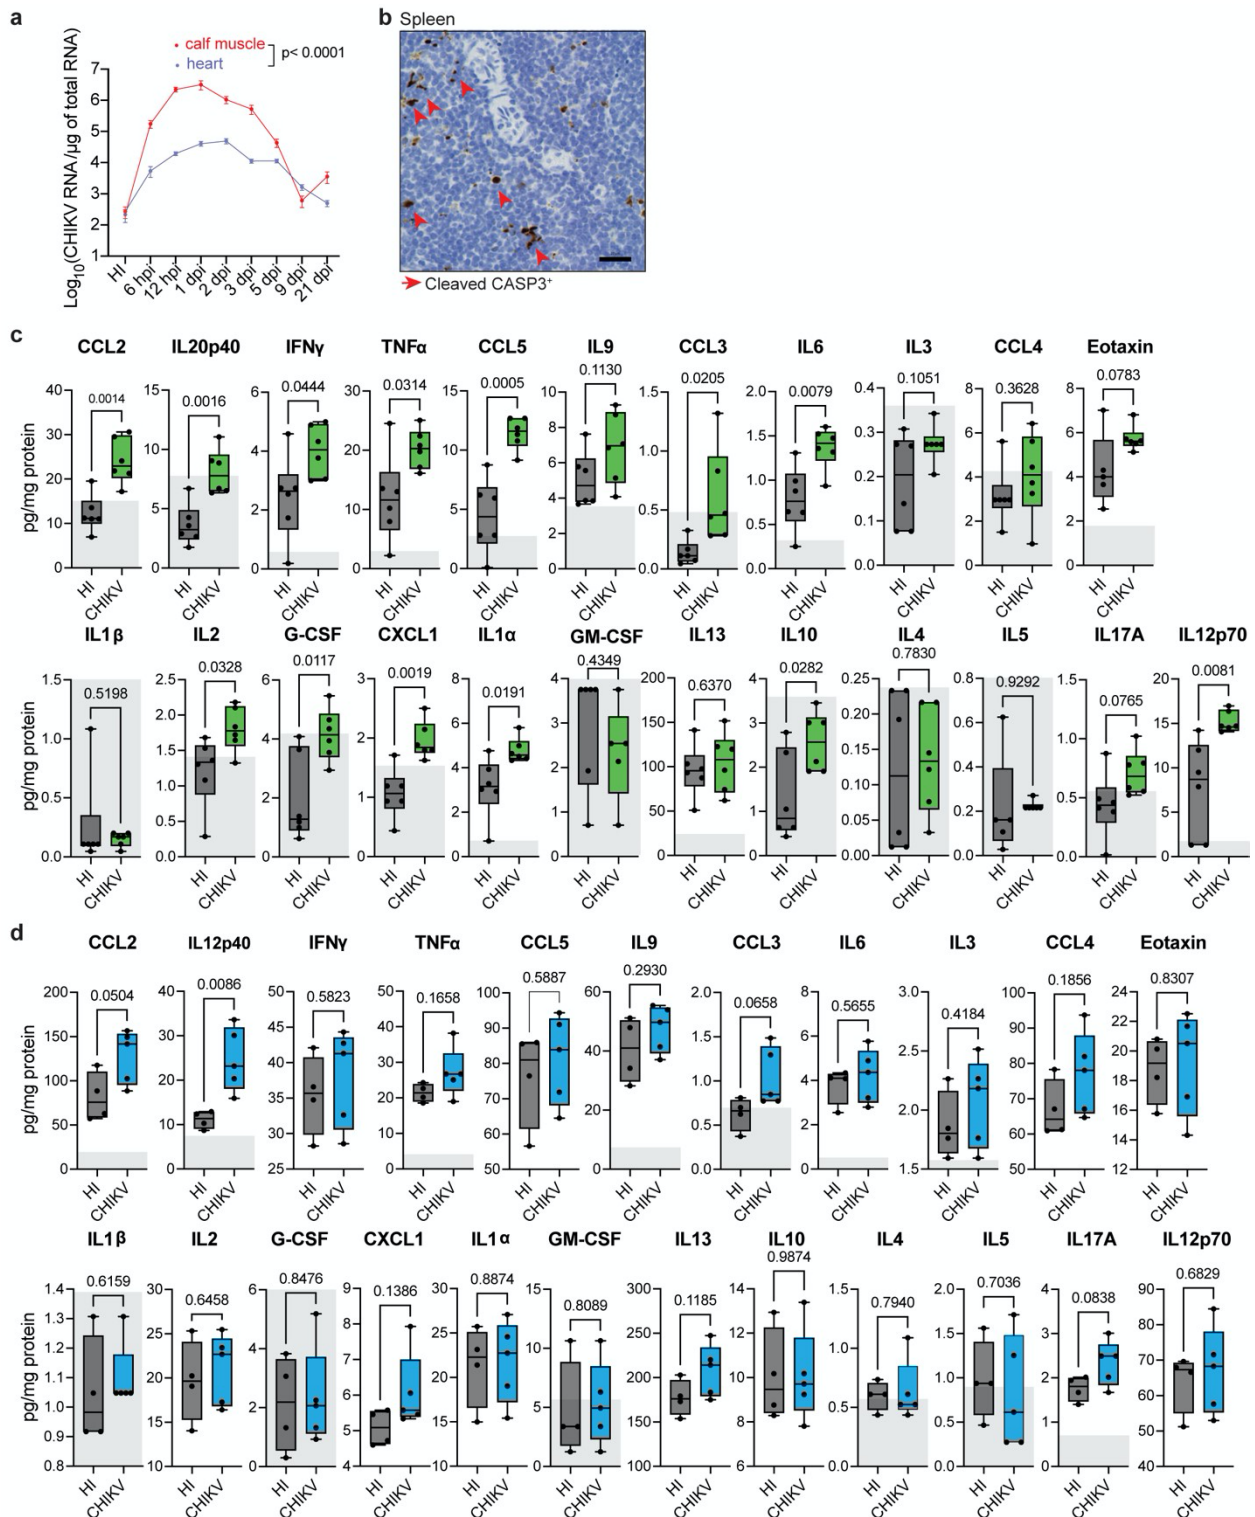

**Supplementary Fig. 2, related to Fig. 2. a.** CHIKV replication kinetics in the heart (blue) and the calf muscle (red) measured by RT-qPCR. Each time point represents the mean  $\pm$  SEM. The gray box represents the background RNA levels determined for mock-infected controls (PBS). For heart tissue homogenates: HI-control (n=39), 6 hpi (n=5), 12 hpi (n=5), 1 dpi (n=9), 2 dpi (n=18), 3 dpi (n=7), 5 dpi (n=13), 9 dpi (n=8) and 21 dpi (n=8). For calf muscle homogenates: HI-control (n=21), 6 hpi (n=5), 12 hpi (n=5), 1 dpi (n=9), 2 dpi (n=8), 3 dpi (n=7), 5 dpi (n=4), 9 dpi (n=4), and 21 dpi (n=8). **b.** Positive control signal of cleaved CASP3 antibody staining used for IHC (representative image from at least three repetitions). Scale= 20  $\mu$ m. **c-d.** Individual values from which **Fig.2d** was generated. Each bar graph represents the protein levels in cardiac tissue homogenates for different analytes from the Bio-Plex Pro Mouse Cytokine 23-plex Assay. Values within the gray shading represent concentrations of the analyte that were beyond the calibration curve and therefore determined by extrapolation of the curve by the Luminex Software. Mock: HI inoculum. 2 dpi: HI-control and CHIKV-infected hearts (n=6/group). 5 dpi: HI-control (n=4) and CHIKV-infected hearts (n=5). Boxplots show median and quartile ranges, whiskers represent the range. P values were calculated using mixed-effects model test (**a**) or using two-tailed Mann-Whitney test (**c-d**). Source data are provided as a source data file.

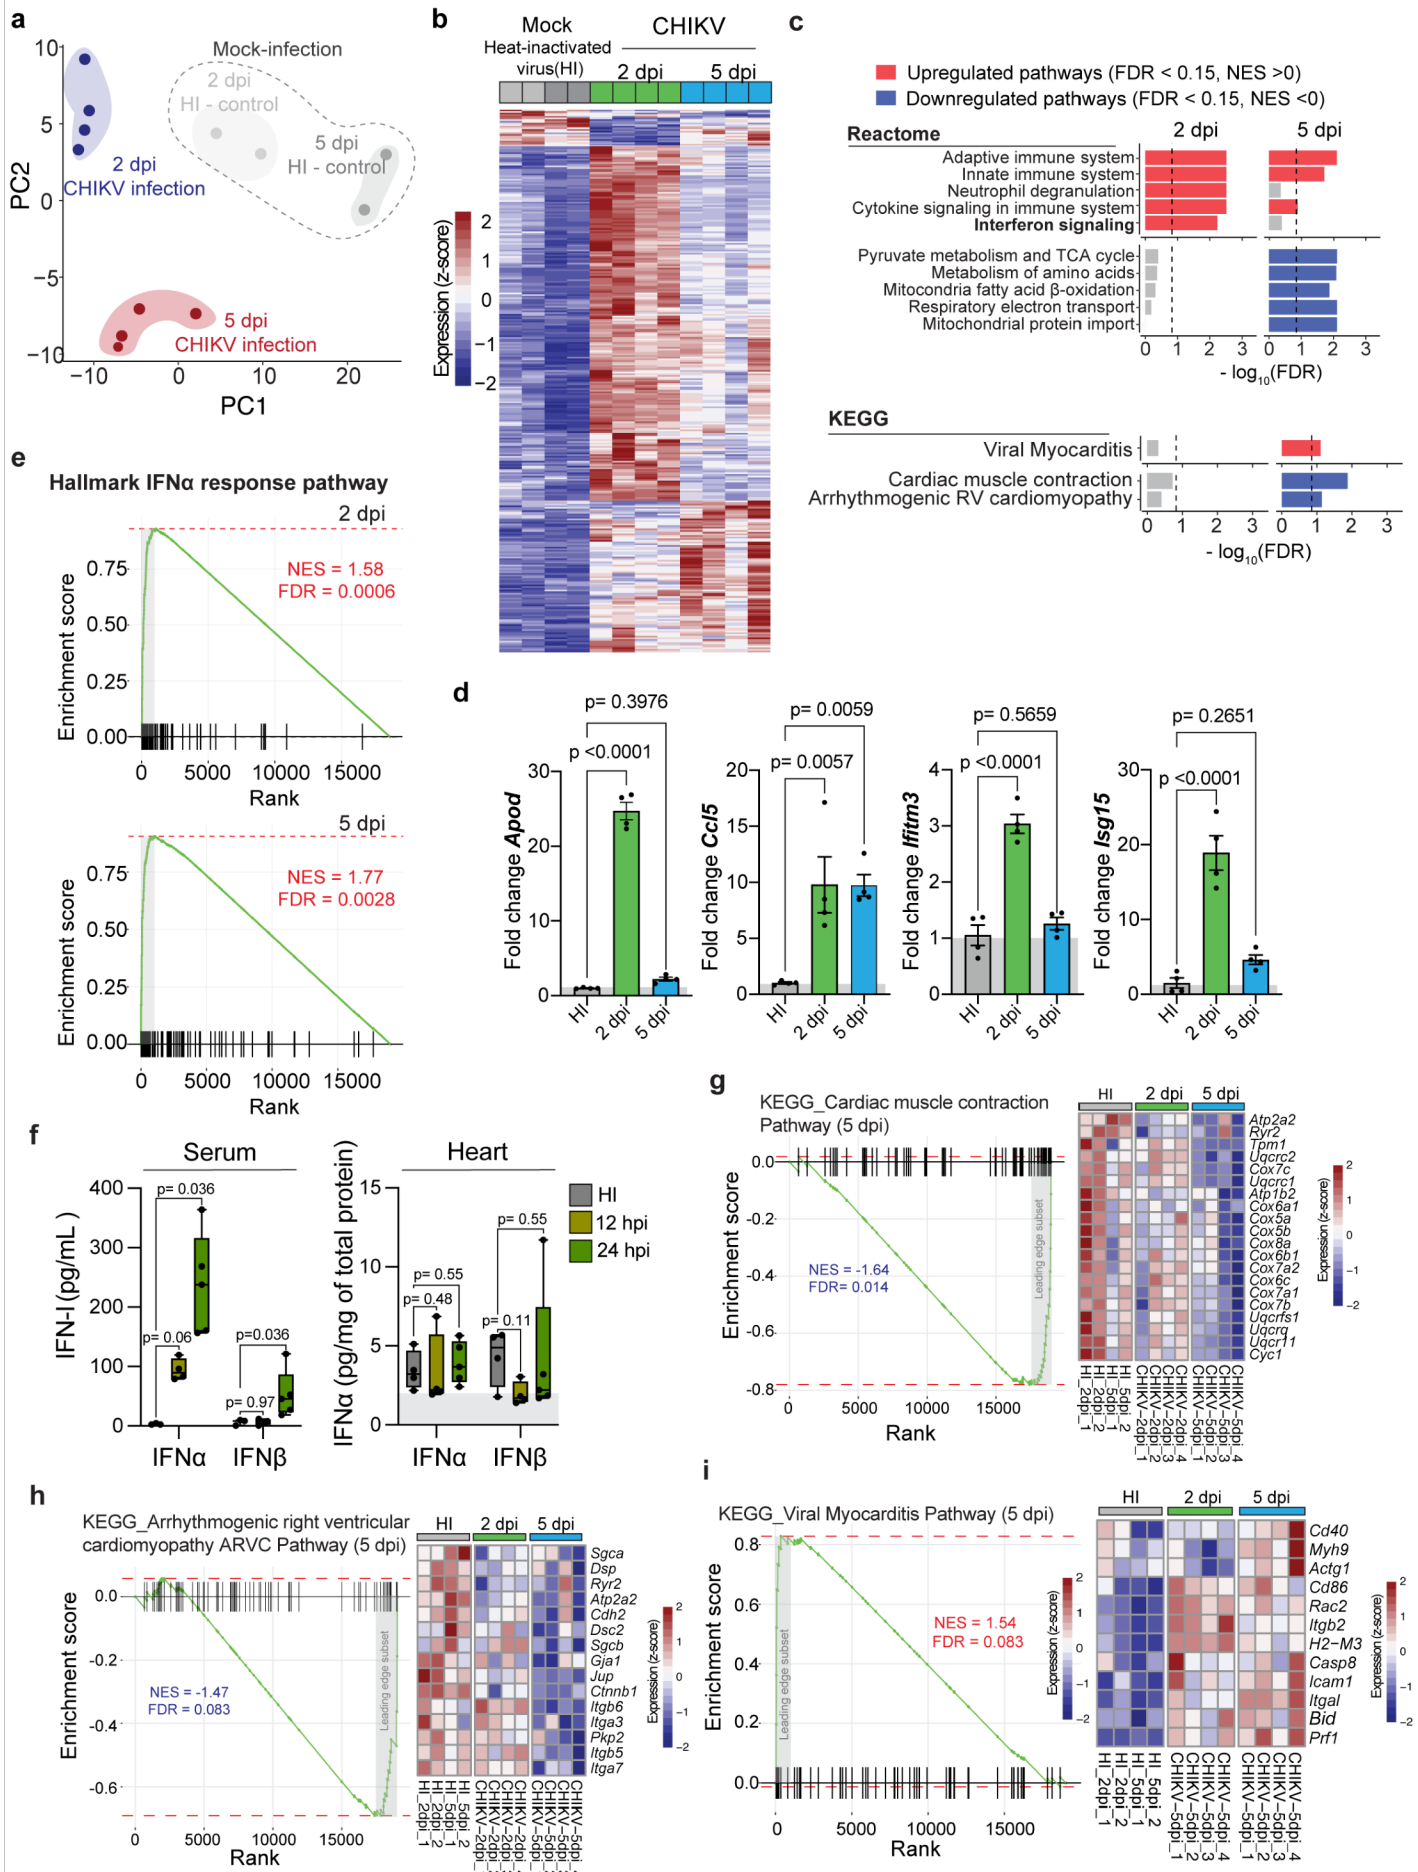

**Supplementary Fig. 3, related to Fig. 2 and Fig.3.** **a.** Principal component analysis (PCA) showing that biological replicates clustered by treatment. **b.** Heatmap showing differentially expressed genes (FDR < 0.15 and absolute log<sub>2</sub> FC > 1). The boxes on top indicate the biological replicates for mock (heat-inactivated virus; n=4; grey boxes) and CHIKV-infected at either 2 dpi (n=4; green boxes) or 5 dpi (n=4; blue boxes). **c.** GSEA pathway enrichment analysis for Reactome, and KEGG datasets showing top and downregulated pathways at 2 dpi and 5 dpi. **d.** Validation of RNAseq targets. *Apod*, *Ccl5*, *Ifitm3*, and *Isg15* expression levels from CHIKV-infected and mock-infected (HI-inoculum) heart homogenates were measured by RT-qPCR at 2 and 5 dpi. Gray boxes indicate fold change of 1. HI-control (n=4), 2dpi (n=4) and 5 dpi (n=4). Data represent mean +/- SEM. **e.** Enrichment plot for the IFN $\alpha$  response pathway (Hallmark) at 2 dpi (upper panel) and 5 dpi (bottom panel). **f.** Protein levels of IFN- $\alpha$  and INF- $\beta$  in serum (left panel) and heart tissue homogenates (right panel) at 2 dpi. Values within the gray shading represent concentrations of the analyte that were beyond the calibration curve and therefore determined by extrapolation of the curve by the Luminex Software. For serum: HI-control (n=3), 12 hpi (n=4) and 24 hpi (n=5). For heart tissue homogenates: HI-control (n=4), 12 hpi (n=4) and 24 hpi (n=5). Boxplots show median and quartile ranges, whiskers represent the range. Dataset at 24 hpi are the same as the dataset for WT at 24 hpi in Fig.4h-i. **(g-i)** Enrichment plot for the cardiac muscle contraction (KEGG) **(g)**, viral arrhythmogenic right ventricular cardiomyopathy (KEGG) at 5 dpi **(h)**, and the viral myocarditis pathway (KEGG) **(i)** at 5 dpi (left panel) and heatmaps indicating expression of the leading-edge genes in mock or CHIKV-infected mice at 2 dpi or 5 dpi. n=4 mice/group. **(e-h).** NES = normalized enrichment score; grey shading indicates the genes belonging to the leading edge. P values were calculated one-way ANOVA with Dunnett's multiple comparison test **(d)** and using two-tailed Mann-Whitney test **(f)**.

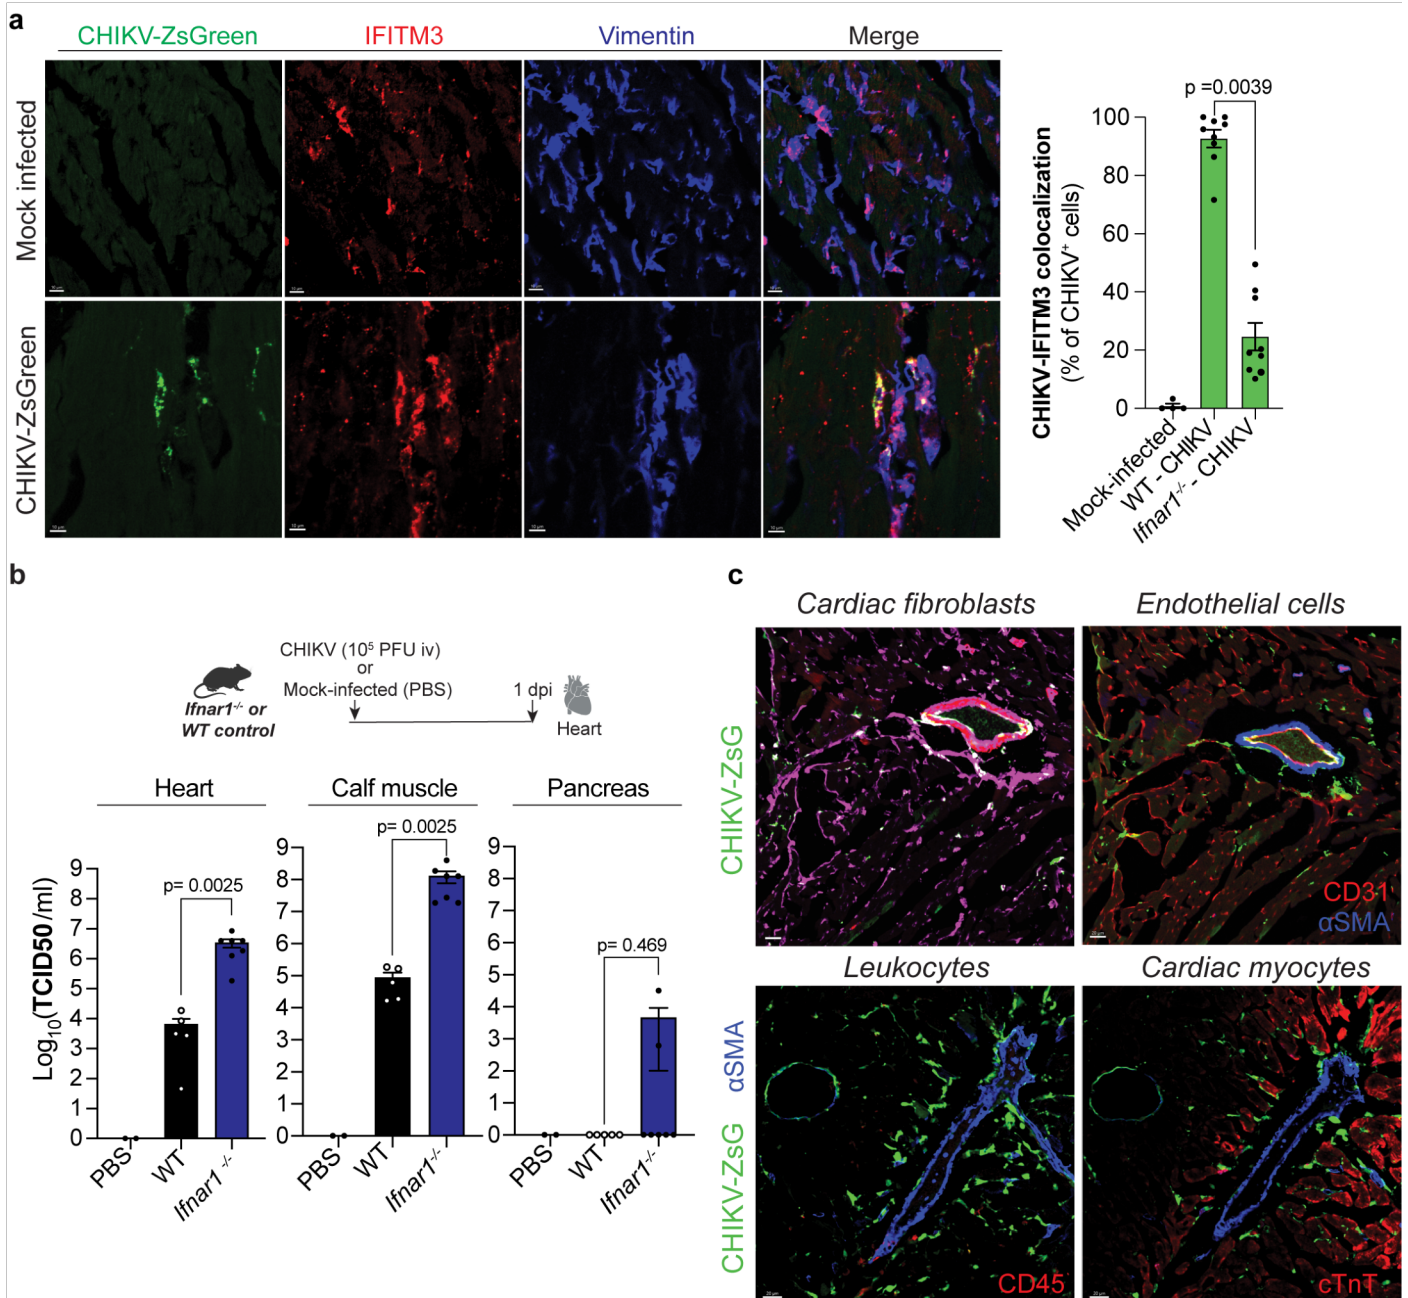

**Supplementary Fig. 4, related to Fig.3. a.** WT and *Ifnar1*<sup>-/-</sup> mice were inoculated intravenously with 1E5 PFU of reporter CHIKV-ZsGreen or mock-infected with PBS, harvested at 2 dpi, and cardiac tissue was stained with antiIFITM3 and anti-vimentin antibodies. Left panel: Representative fluorescence microscopy images from two independent repetitions showing ventricular sections of CHIKV-infected hearts and PBS control. Scale = 10  $\mu$ m. Right panel: Colocalization analysis between CHIKV-infected cells and IFITM3 marker for WT and *Ifnar1*<sup>-/-</sup> infected or mock-infected mice. PBS control: 2 independent fields for n=2 mice. CHIKV-infected WT: 4-5 independent fields for n=2 mice. CHIKV-infected *Ifnar1*<sup>-/-</sup> mice: 4-5 independent fields for n=2 mice. Data are represented as the percentage of the total infected cells overlapping with the IFITM3 marker. **B.** Isolation of CHIKV infectious particles from heart, calf muscle and pancreas of WT or *Ifnar1*<sup>-/-</sup> mice. Mice were infected intravenously with 1E5 PFU of CHIKV or PBS. CHIKV infectious particles were determined by TCID<sub>50</sub> in BHK-21 cells. PBS-control (n=2), CHIKV-infected WT (n=5), and CHIKV-infected *Ifnar1*<sup>-/-</sup> mice (n=7). **c.** Representative fluorescence microscopy images from two independent repetitions showing ventricular sections of *Ifnar1*<sup>-/-</sup> infected hearts colocalizing with markers of cardiac fibroblast, endothelial cells, leukocytes, and cardiac myocytes. Scale= 20  $\mu$ m. **d.** Data are represented as mean  $\pm$  SEM (**a-b**). P values were calculated using twotailed Wilcoxon test (**a**) and two-tailed Mann-Whitney test (**b**). Created with BioRender.com. Source data are provided as a source data file.

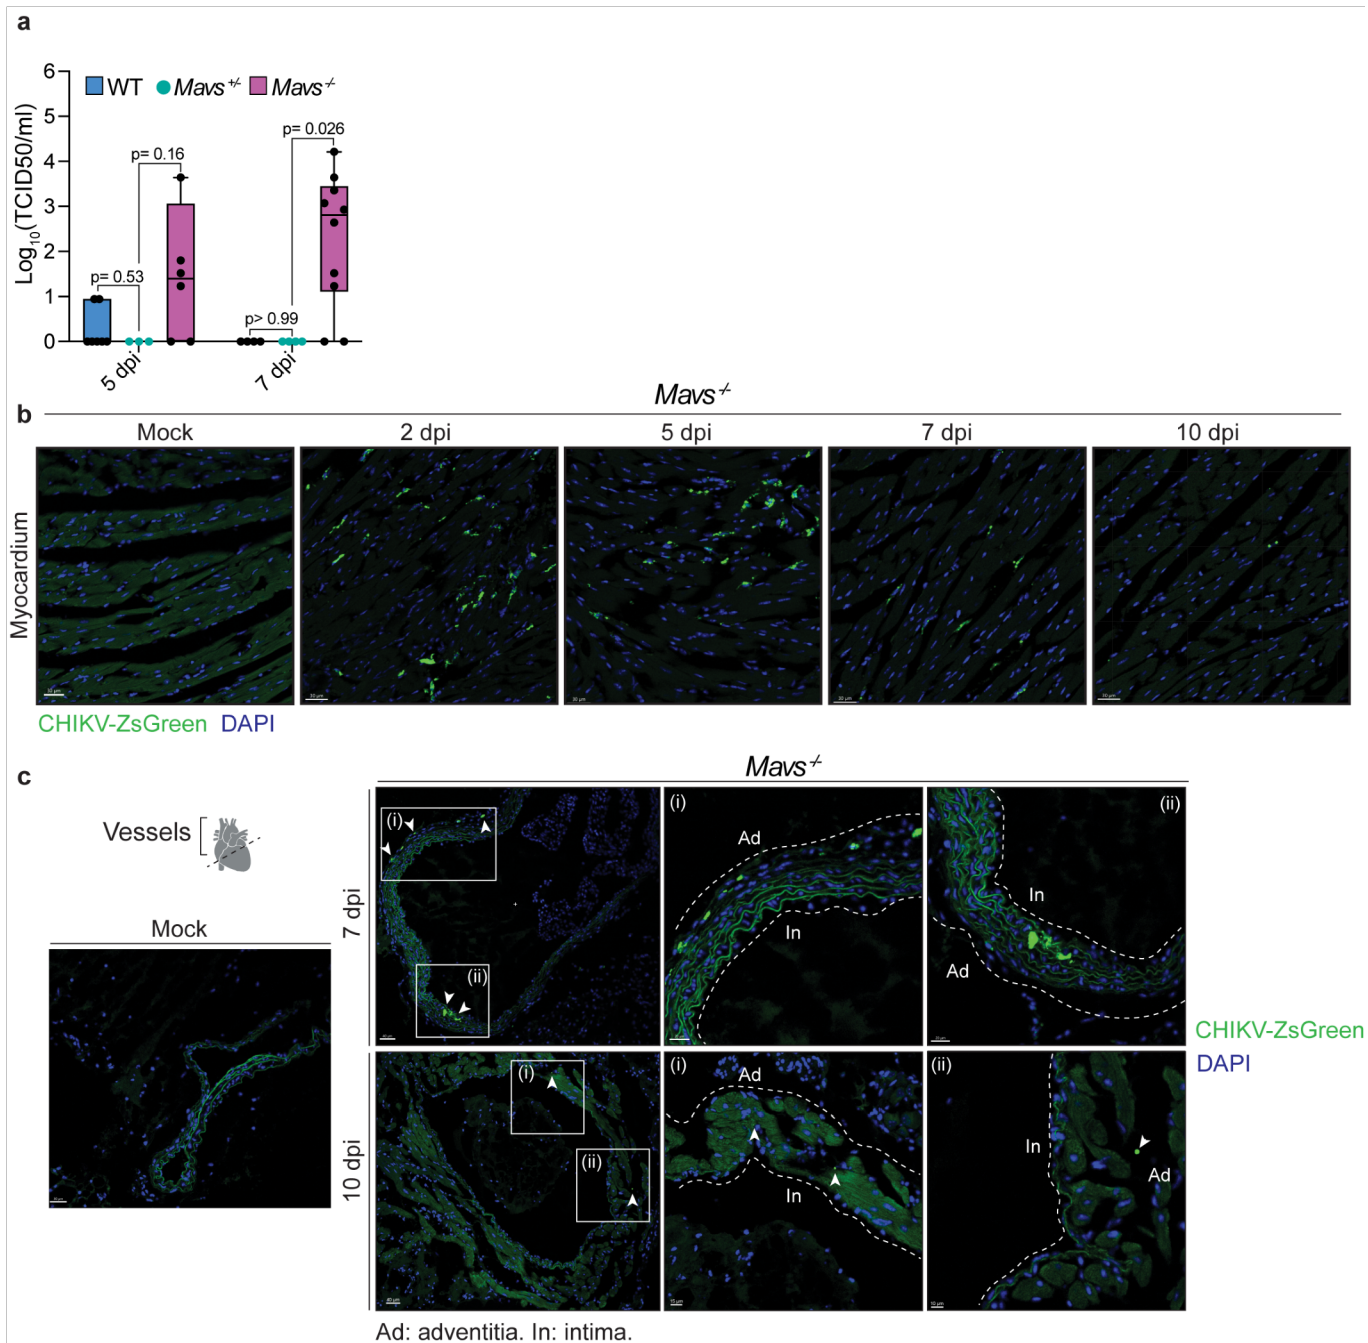

**Supplementary Fig. 5, related to Fig.4. a.** CHIKV cardiac infection kinetics in *Mavs<sup>-/-</sup>*, *Mavs<sup>+/-</sup>* and WT mice. Mice were infected intravenously with 1E5 PFU of CHIKV. CHIKV infectious particles from heart homogenates were determined by TCID<sub>50</sub> in BHK-21. For 5 dpi: WT (n=7), *Mavs<sup>+/-</sup>* (n=3), and *Mavs<sup>-/-</sup>* (n=6). For 7 dpi: WT (n=4), *Mavs<sup>+/-</sup>* (n=4), and *Mavs<sup>-/-</sup>* (n=10). Boxplots show median and quartile ranges, whiskers represent the range. Data set from *Mavs<sup>-/-</sup>* and WT mice are the same from **Fig 4b** at time point 5 and 7 dpi. **b.** Representative fluorescent microscopy images from two independent repetitions showing ventricular sections of CHIKV-ZsGreen infected *Mavs<sup>-/-</sup>* hearts. Scale=30  $\mu$ m. **c.** Representative fluorescent microscopy images from two independent repetitions showing vessels of CHIKV-ZsGreen infected *Mavs<sup>-/-</sup>* hearts. Scale= 10-40  $\mu$ m. P values were calculated using two-tailed multiple Mann-Whitney tests (**a**). Created with BioRender.com. Source data are provided as a source data file.

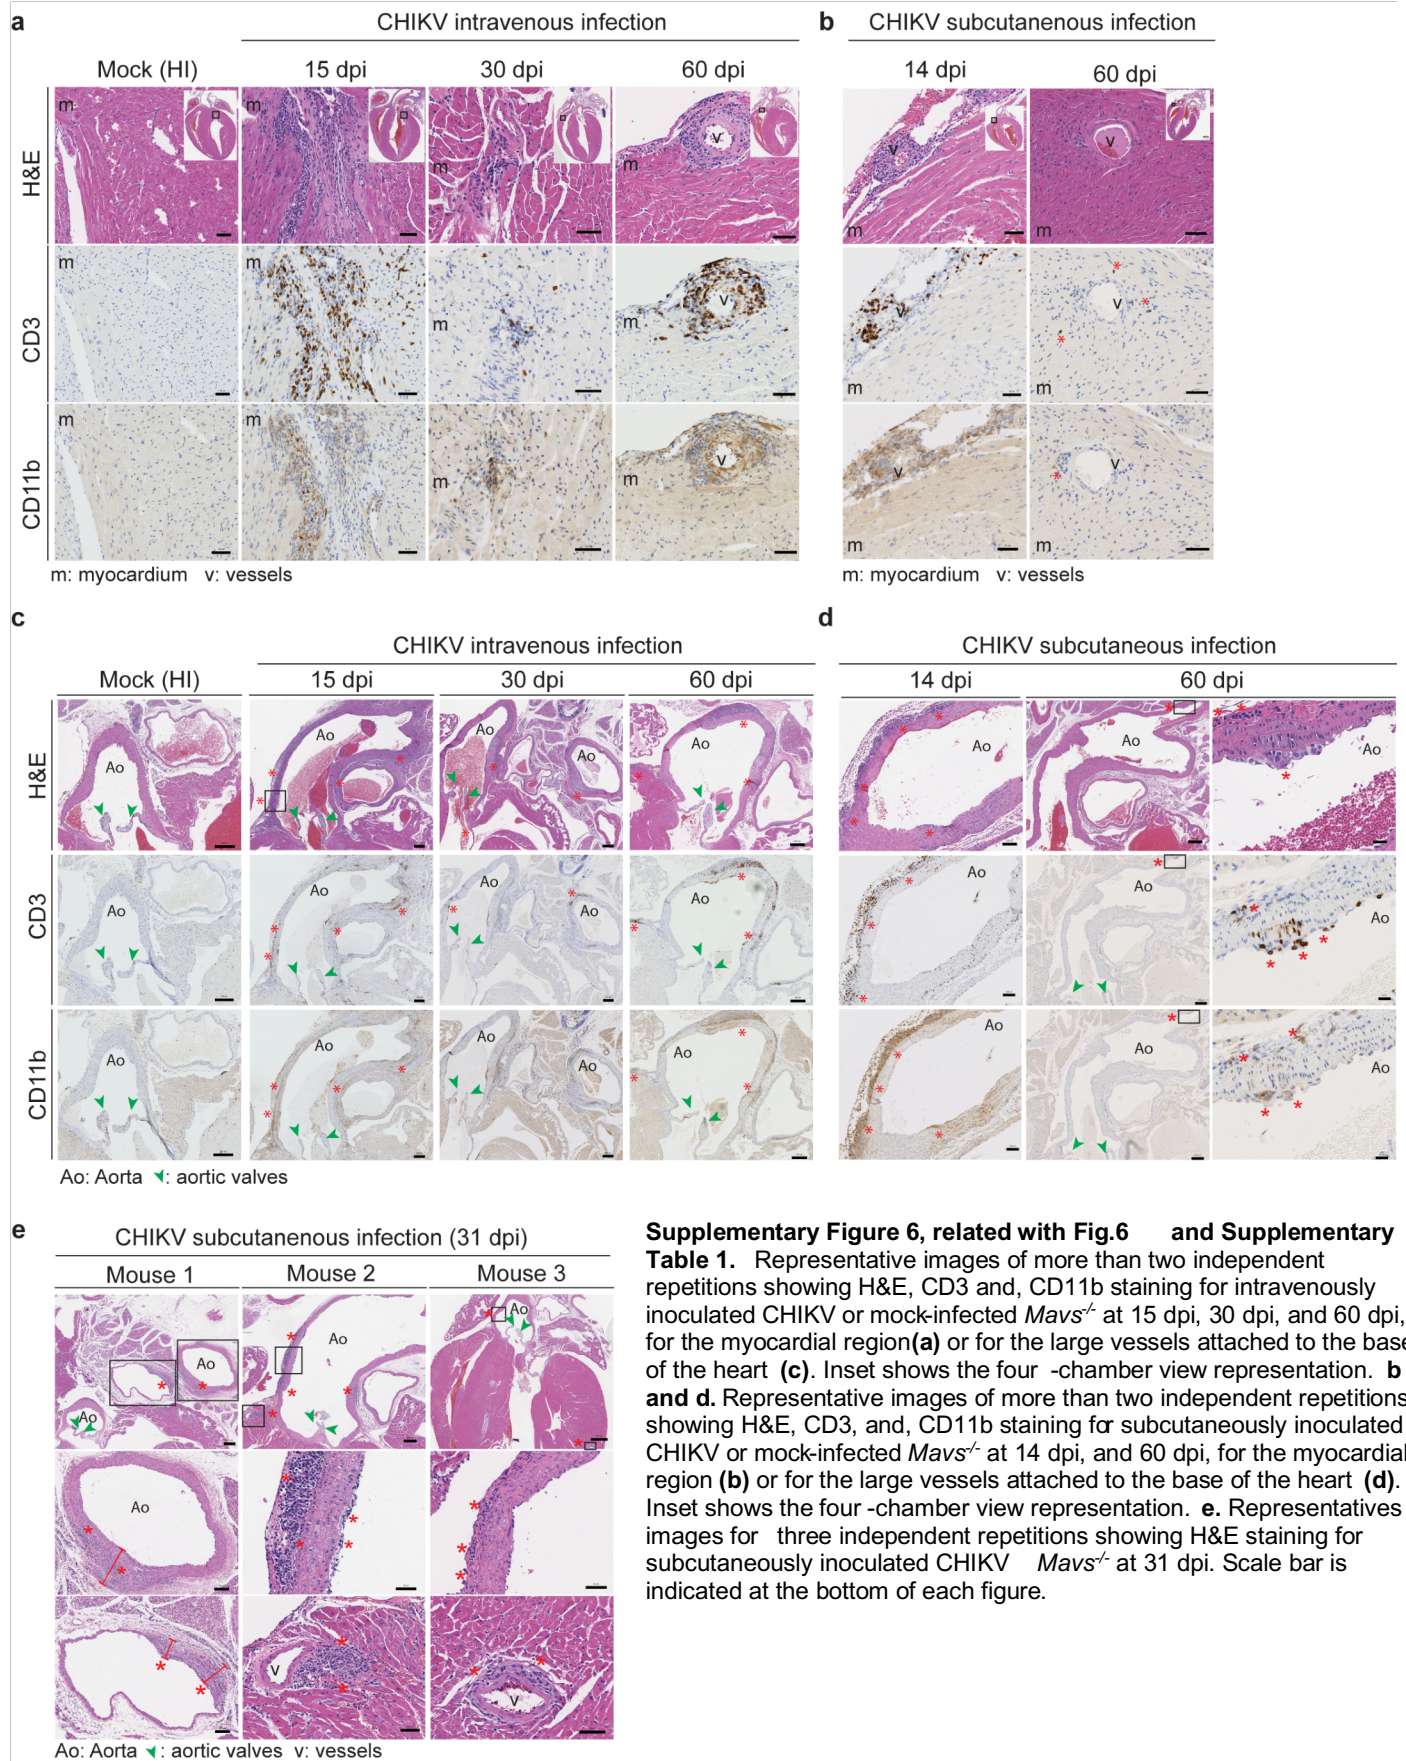



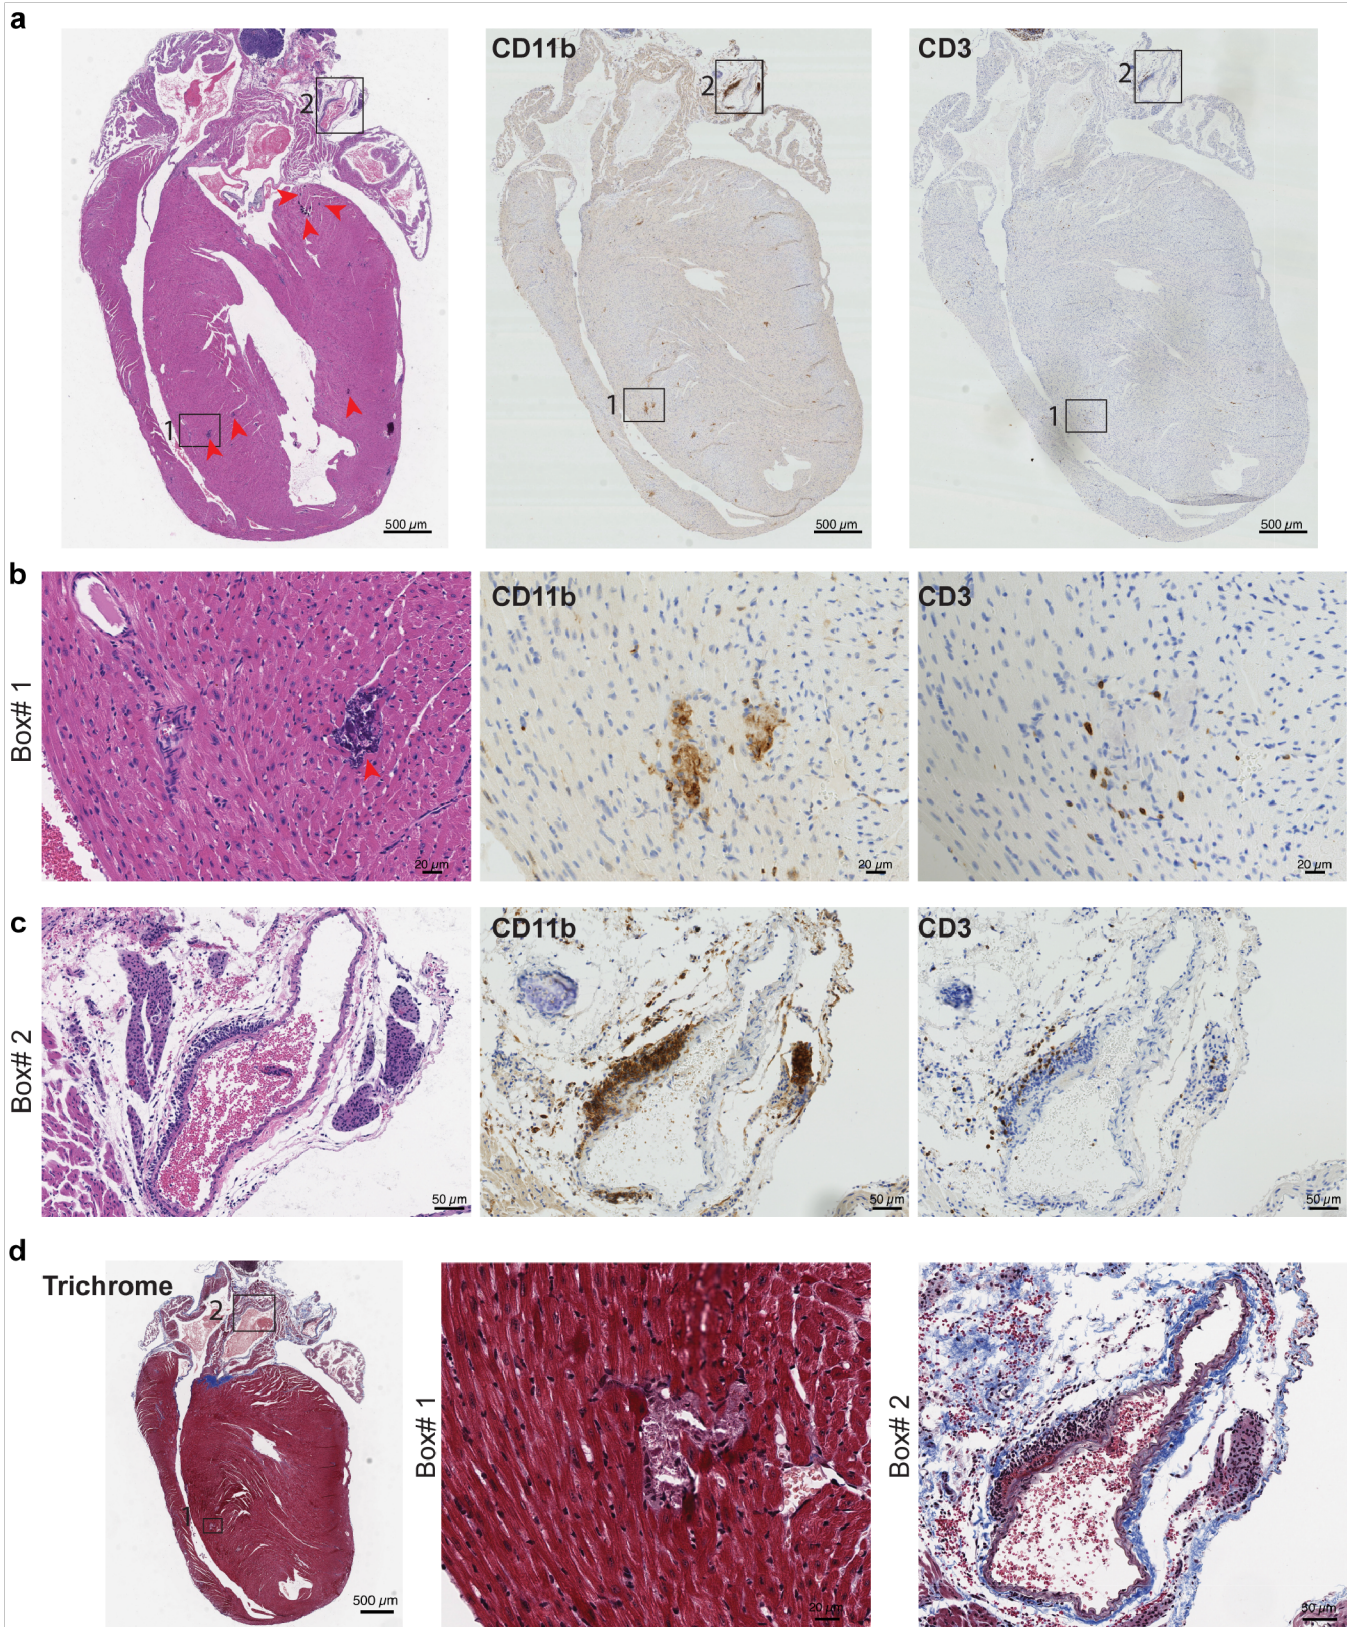

**Supplementary Fig. 7, related to Supplementary Table 1.** **a.** Four-chamber view representation of cardiac tissue from a 15 dpi *Mavs*<sup>-/-</sup> mouse that succumbed to CHIKV infection (See Supplementary Table 1). Left panel, H&E showing four-chamber view and large vessels at the base of the heart. Middle panel: consecutive section stained with CD11b antibody. Right panel: consecutive section stained with CD3 antibody. Scale = 500  $\mu$ m. **b.** Magnification of the ventricular region section (Box #1) for H&E, CD11b and CD3 staining showing infiltrates. Scale = 20  $\mu$ m. **c.** Magnification of the pulmonary artery (PA) section (Box #2) for H&E, CD11b and CD3 staining. Scale = 50  $\mu$ m. **d.** Mason Trichrome staining, showing no signs of fibrosis. Scale bar is indicated in each figure panel. **(a-d).** Images shown here correspond to one repetition and represent one isolated event that occurred during the study (See Supplementary Table 1).

**Supplementary Table 1.** Disease scores of CHIKV- or mock-infected mice measured at experimental endpoint.

| Genotype                     | Condition      | n    | Inoculation route | Dose    | Experimental endpoint | Macroscopic assessment at endpoint                                                                                                                                                                                                                                                                            |                                                                                                                                                                                                                                                                                                                                                                                          |
|------------------------------|----------------|------|-------------------|---------|-----------------------|---------------------------------------------------------------------------------------------------------------------------------------------------------------------------------------------------------------------------------------------------------------------------------------------------------------|------------------------------------------------------------------------------------------------------------------------------------------------------------------------------------------------------------------------------------------------------------------------------------------------------------------------------------------------------------------------------------------|
| <i>Ifnar1</i> <sup>-/-</sup> | CHIKV          | n=11 | intravenous       | 1E5 PFU | 1 dpi                 | Unremarkable (No inflammation in the left or right hindlimb. No signs of distress)                                                                                                                                                                                                                            | <p><u>Notes while setting up the experimental conditions:</u> <i>Ifnar1</i><sup>-/-</sup> mice infected intravenously with 1E5 PFU of CHIKV succumb to the infection between 36 to 48 hpi. Before that, they don't show any remarkable signs of inflammation. Meanwhile, mice infected via footpad injection show extreme inflammation at the injection site noticeable after 1 dpi.</p> |
|                              | PBS-control    | n=4  | intravenous       | 1E5 PFU | 1 dpi                 |                                                                                                                                                                                                                                                                                                               |                                                                                                                                                                                                                                                                                                                                                                                          |
| <i>Mavs</i> <sup>-/-</sup>   | CHIKV          | n=20 | intravenous       | 1E5 PFU | 2 dpi/5 dpi/ 7 dpi    | Unremarkable (Mild to any inflammation at the inoculation site (tail). No inflammation in the left or right hindlimb. No signs of distress.)                                                                                                                                                                  |                                                                                                                                                                                                                                                                                                                                                                                          |
|                              | PBS/HI-control | n=4  | intravenous       | 1E5 PFU | 2 dpi/5 dpi/7 dpi     | Unremarkable                                                                                                                                                                                                                                                                                                  |                                                                                                                                                                                                                                                                                                                                                                                          |
|                              | CHIKV          | n=44 | intravenous       | 1E5 PFU | 10 dpi to 60 dpi      | 4 out of 44 animals were found dead or reached the humane endpoint. (Briefly: 2 were found dead at 10 dpi. 1 was lethargic at 14 dpi and needed to be euthanized. 1 was lethargic/immobile at 15 dpi and needed to be euthanized.). The remaining 44 animals showed no distinctive signs of disease/distress. | <p><u>Notes:</u> Histopathology of the heart was performed for one animal that succumbed to the infection (Supplementary Fig.7).</p>                                                                                                                                                                                                                                                     |
|                              | PBS/HI-control | n=12 | intravenous       | 1E5 PFU | 10 dpi to 60 dpi      | Unremarkable                                                                                                                                                                                                                                                                                                  |                                                                                                                                                                                                                                                                                                                                                                                          |
|                              | CHIKV          | n=44 | subcutaneous      | 1E5 PFU | 10 dpi to 60 dpi      | Unremarkable                                                                                                                                                                                                                                                                                                  |                                                                                                                                                                                                                                                                                                                                                                                          |
|                              | PBS/HI-control | n=12 | subcutaneous      | 1E5 PFU | 10 dpi to 60 dpi      | Unremarkable                                                                                                                                                                                                                                                                                                  |                                                                                                                                                                                                                                                                                                                                                                                          |

**Supplementary Table 2. Pathway enrichment analysis from Hallmark dataset.** For pathways enrichment analysis, genes were ranked based on  $-\log_{10}(\text{FDR})$  values, assigning a positive or negative value depending on the direction of change. The pathway lists were obtained from the msigdb (v7.2.1) package (Hallmark, REACTOME or KEGG) and used as input for GSEA pathway enrichment analysis through the fgsea (v1.12.0) R package. Significant regulated pathways. (FDR < 0.15 and normalized enrichment score [NES] > 0). All pathways represented in **Fig. 2f** are highlighted in bold.

|    | 2 dpi                                      | pval           | padj          | $-\log_{10}(\text{padj})$ | NES          |
|----|--------------------------------------------|----------------|---------------|---------------------------|--------------|
| 1  | <b>HALLMARK_INTERFERON_GAMMA_RESPONSE</b>  | <b>0.00001</b> | <b>0.0005</b> | <b>3.30</b>               | <b>1.62</b>  |
| 2  | <b>HALLMARK_INTERFERON_ALPHA_RESPONSE</b>  | <b>0.00002</b> | <b>0.0006</b> | <b>3.22</b>               | <b>1.58</b>  |
| 3  | HALLMARK_ALLOGRAFT_REJECTION               | 0.00038        | 0.0063        | 2.20                      | 1.5          |
| 4  | <b>HALLMARK_COMPLEMENT</b>                 | <b>0.003</b>   | <b>0.032</b>  | <b>1.49</b>               | <b>1.44</b>  |
| 5  | <b>HALLMARK_MTORC1_SIGNALING</b>           | <b>0.003</b>   | <b>0.032</b>  | <b>1.49</b>               | <b>1.44</b>  |
| 6  | HALLMARK_KRAS_SIGNALING_UP                 | 0.006          | 0.054         | 1.27                      | 1.42         |
| 7  | <b>HALLMARK_UNFOLDED_PROTEIN_RESPONSE</b>  | <b>0.012</b>   | <b>0.086</b>  | <b>1.07</b>               | <b>1.42</b>  |
| 8  | <b>HALLMARK_INFLAMMATORY_RESPONSE</b>      | <b>0.017</b>   | <b>0.105</b>  | <b>0.98</b>               | <b>1.37</b>  |
| 9  | HALLMARK_COAGULATION                       | 0.019          | 0.108         | 0.97                      | 1.39         |
| 10 | HALLMARK_IL6_JAK_STAT3_SIGNALING           | 0.022          | 0.112         | 0.95                      | 1.4          |
| 11 | HALLMARK_EPITHELIAL_MESENCHYMAL_TRANSITION | 0.033          | 0.127         | 0.90                      | -1.28        |
| 12 | HALLMARK_MYC_TARGETS_V1                    | 0.033          | 0.127         | 0.90                      | 1.32         |
| 13 | HALLMARK_NOTCH_SIGNALING                   | 0.032          | 0.127         | 0.90                      | -1.46        |
| 14 | HALLMARK_TGF_BETA_SIGNALING                | 0.039          | 0.138         | 0.86                      | -1.43        |
| 15 | HALLMARK_TNFA_SIGNALING_VIA_NFKB           | 0.043          | 0.144         | 0.84                      | 1.3          |
| 26 | <b>HALLMARK_OXIDATIVE_PHOSPHORYLATION</b>  | <b>0.211</b>   | <b>0.408</b>  | <b>0.39</b>               | <b>-1.08</b> |
| 38 | <b>HALLMARK_FATTY_ACID_METABOLISM</b>      | <b>0.701</b>   | <b>0.922</b>  | <b>0.04</b>               | <b>0.89</b>  |
|    |                                            |                |               |                           |              |
|    | 5 dpi                                      | pval           | padj          | $-\log_{10}(\text{padj})$ | NES          |
| 1  | HALLMARK_ADIPOGENESIS                      | 0.00004        | 0.0005        | 3.30                      | -1.72        |
| 2  | <b>HALLMARK_FATTY_ACID_METABOLISM</b>      | <b>0.00004</b> | <b>0.0005</b> | <b>3.30</b>               | <b>-1.89</b> |
| 3  | <b>HALLMARK_INTERFERON_GAMMA_RESPONSE</b>  | <b>0.00003</b> | <b>0.0005</b> | <b>3.30</b>               | <b>1.81</b>  |
| 4  | <b>HALLMARK_OXIDATIVE_PHOSPHORYLATION</b>  | <b>0.00004</b> | <b>0.0005</b> | <b>3.30</b>               | <b>-2.17</b> |
| 5  | HALLMARK_ALLOGRAFT_REJECTION               | 0.0002         | 0.002         | 2.70                      | 1.76         |
| 6  | HALLMARK_BILE_ACID_METABOLISM              | 0.0004         | 0.003         | 2.52                      | -1.64        |
| 7  | <b>HALLMARK_INTERFERON_ALPHA_RESPONSE</b>  | <b>0.0004</b>  | <b>0.003</b>  | <b>2.52</b>               | <b>1.77</b>  |
| 8  | HALLMARK_PEROXISOME                        | 0.001          | 0.006         | 2.22                      | -1.6         |
| 9  | HALLMARK_E2F_TARGETS                       | 0.0033         | 0.017         | 1.77                      | 1.66         |
| 10 | HALLMARK_XENOBIOTIC_METABOLISM             | 0.0034         | 0.017         | 1.77                      | -1.45        |
| 11 | <b>HALLMARK_COMPLEMENT</b>                 | <b>0.0099</b>  | <b>0.043</b>  | <b>1.37</b>               | <b>1.58</b>  |
| 12 | <b>HALLMARK_INFLAMMATORY_RESPONSE</b>      | <b>0.0102</b>  | <b>0.043</b>  | <b>1.37</b>               | <b>1.57</b>  |
| 13 | HALLMARK_G2M_CHECKPOINT                    | 0.0129         | 0.049         | 1.31                      | 1.53         |
| 14 | <b>HALLMARK_MTORC1_SIGNALING</b>           | <b>0.0158</b>  | <b>0.053</b>  | <b>1.28</b>               | <b>1.5</b>   |
| 15 | HALLMARK_TGF_BETA_SIGNALING                | 0.0149         | 0.053         | 1.28                      | -1.49        |
| 16 | HALLMARK_PI3K_AKT_MTOR_SIGNALING           | 0.0177         | 0.055         | 1.26                      | 1.5          |
| 17 | HALLMARK_IL6_JAK_STAT3_SIGNALING           | 0.0303         | 0.089         | 1.05                      | 1.46         |
| 18 | HALLMARK_MITOTIC_SPINDLE                   | 0.0416         | 0.104         | 0.98                      | 1.37         |
| 19 | HALLMARK_TNFA_SIGNALING_VIA_NFKB           | 0.0377         | 0.104         | 0.98                      | 1.38         |
| 20 | <b>HALLMARK_UNFOLDED_PROTEIN_RESPONSE</b>  | <b>0.0417</b>  | <b>0.104</b>  | <b>0.98</b>               | <b>1.4</b>   |

|    |                              |        |       |      |       |
|----|------------------------------|--------|-------|------|-------|
| 21 | HALLMARK_GLYCOLYSIS          | 0.0469 | 0.112 | 0.95 | -1.26 |
| 22 | HALLMARK_MYOGENESIS          | 0.0509 | 0.116 | 0.94 | -1.25 |
| 23 | HALLMARK_IL2_STAT5_SIGNALING | 0.0585 | 0.127 | 0.90 | 1.33  |
| 24 | HALLMARK_ANDROGEN_RESPONSE   | 0.063  | 0.131 | 0.88 | 1.36  |

**Supplementary Table 3. Pathway enrichment analysis from Reactome dataset.** For pathways enrichment analysis, genes were ranked based on  $-\log_{10}(\text{FDR})$  values, assigning a positive or negative value depending on the direction of change. The pathway lists were obtained from the msigdb (v7.2.1) package (Hallmark, REACTOME or KEGG) and used as input for GSEA pathway enrichment analysis through the fgsea (v1.12.0) R package. Significant regulated pathways. (FDR < 0.15 and normalized enrichment score [NES] > 0).

| 2 dpi |                                                                                                                           | pval       | padj       | $-\log_{10}(\text{padj})$ | NES   |
|-------|---------------------------------------------------------------------------------------------------------------------------|------------|------------|---------------------------|-------|
| 1     | REACTOME_ADAPTIVE_IMMUNE_SYSTEM                                                                                           | 0.00001    | 0.0059     | 2.23                      | 1.43  |
| 2     | REACTOME_INNATE_IMMUNE_SYSTEM                                                                                             | 0.00001    | 0.0059     | 2.23                      | 1.47  |
| 3     | REACTOME_CYTOKINE_SIGNALING_IN_IMMUNE_SYSTEM                                                                              | 0.00003    | 0.009      | 2.05                      | 1.37  |
| 4     | REACTOME_NEUTROPHIL_DEGRANULATION                                                                                         | 0.00003    | 0.009      | 2.05                      | 1.47  |
| 5     | REACTOME_IMMUNOREGULATORY_INTERACTIONS_BETWEEN_A_LYMPHOID_AND_A_NON_LYMPHOID_CELL                                         | 0.00004    | 0.01       | 2.00                      | 1.57  |
| 6     | REACTOME_INTERFERON_SIGNALING                                                                                             | 0.00006    | 0.01       | 2.00                      | 1.55  |
| 7     | REACTOME_CELLULAR_RESPONSES_TO_EXTERNAL_STIMULI                                                                           | 0.0004     | 0.05       | 1.30                      | 1.36  |
| 8     | REACTOME_COLLAGEN_BIOSYNTHESIS_AND_MODIFYING_ENZYMES                                                                      | 0.0003     | 0.05       | 1.30                      | -1.73 |
| 9     | REACTOME_DEUBIQUITINATION                                                                                                 | 0.0003     | 0.05       | 1.30                      | 1.45  |
| 10    | REACTOME_COMPLEMENT_CASCADE                                                                                               | 0.001      | 0.1        | 1.00                      | 1.54  |
| 11    | REACTOME_SIGNALING_BY_INTERLEUKINS                                                                                        | 0.0009     | 0.1        | 1.00                      | 1.38  |
| 12    | REACTOME_INFECTIOUS_DISEASE                                                                                               | 0.0013     | 0.11       | 0.96                      | 1.3   |
| 13    | REACTOME_METABOLISM_OF_RNA                                                                                                | 0.0011     | 0.11       | 0.96                      | 1.31  |
| 14    | REACTOME_SIGNALING_BY_CYTOSOLIC_FGFR1_FUSION_MUTANTS                                                                      | 0.0013     | 0.11       | 0.96                      | 1.46  |
| 15    | REACTOME_UB_SPECIFIC_PROCESSING_PROTEASES                                                                                 | 0.0012     | 0.11       | 0.96                      | 1.46  |
| 16    | REACTOME_CLASS_I_MHC_MEDIATED_ANTIGEN_PROCESSING_PRESENTATION                                                             | 0.0018     | 0.13       | 0.89                      | 1.38  |
| 17    | REACTOME_HIV_INFECTION                                                                                                    | 0.0021     | 0.14       | 0.85                      | 1.44  |
| 18    | REACTOME_INTERFERON_ALPHA_BETA_SIGNALING                                                                                  | 0.0023     | 0.14       | 0.85                      | 1.51  |
| 19    | REACTOME_MISCELLANEOUS_TRANSPORT_AND_BINDING_EVENTS                                                                       | 0.0023     | 0.14       | 0.85                      | -1.6  |
| 5 dpi |                                                                                                                           | pval       | padj       | $-\log_{10}(\text{padj})$ | NES   |
| 1     | REACTOME_ADAPTIVE_IMMUNE_SYSTEM                                                                                           | 2.17E-05   | 0.00622031 | 2.21                      | 1.62  |
| 2     | REACTOME_MITOCHONDRIAL_PROTEIN_IMPORT                                                                                     | 2.67E-05   | 0.00622031 | 2.21                      | -1.77 |
| 3     | REACTOME_PROTEIN_LOCALIZATION                                                                                             | 3.67E-05   | 0.00622031 | 2.21                      | -1.83 |
| 4     | REACTOME_PYRUVATE_METABOLISM_AND_CITRIC_ACID_TCA_CYCLE                                                                    | 2.56E-05   | 0.00622031 | 2.21                      | -1.82 |
| 5     | REACTOME_RESPIRATORY_ELECTRON_TRANSPORT                                                                                   | 2.91E-05   | 0.00622031 | 2.21                      | -1.91 |
| 6     | REACTOME_RESPIRATORY_ELECTRON_TRANSPORT_ATP_SYNTHESIS_BY_CHEMIOSMOTIC_COUPLING_AND_HEAT_PRODUCTION_BY_UNCOUPLING_PROTEINS | 3.14E-05   | 0.00622031 | 2.21                      | -1.98 |
| 7     | REACTOME_THE_CITRIC_ACID_TCA_CYCLE_AND_RESPIRATORY_ELECTRON_TRANSPORT                                                     | 3.62E-05   | 0.00622031 | 2.21                      | -2.1  |
| 8     | REACTOME_COMPLEX_I_BIOGENESIS                                                                                             | 5.05E-05   | 0.00666532 | 2.18                      | -1.75 |
| 9     | REACTOME_TRANSLATION                                                                                                      | 5.06E-05   | 0.00666532 | 2.18                      | -1.66 |
| 10    | REACTOME_METABOLISM_OF_AMINO_ACIDS_AND_DERIVATIVES                                                                        | 6.05E-05   | 0.00717182 | 2.14                      | -1.59 |
| 11    | REACTOME_IMMUNOREGULATORY_INTERACTIONS_BETWEEN_A_LYMPHOID_AND_A_NON_LYMPHOID_CELL                                         | 0.00013048 | 0.01405648 | 1.85                      | 1.78  |
| 12    | REACTOME_INNATE_IMMUNE_SYSTEM                                                                                             | 0.00022103 | 0.0201481  | 1.70                      | 1.49  |
| 13    | REACTOME_MITOCHONDRIAL_FATTY_ACID_BETA_OXIDATION                                                                          | 0.00021913 | 0.0201481  | 1.70                      | -1.69 |
| 14    | REACTOME_PEROXISOMAL_PROTEIN_IMPORT                                                                                       | 0.00024398 | 0.02065076 | 1.69                      | -1.71 |
| 15    | REACTOME_SIGNALING_BY_RETINOIC_ACID                                                                                       | 0.00056378 | 0.04453868 | 1.35                      | -1.65 |
| 16    | REACTOME_MITOCHONDRIAL_BIOGENESIS                                                                                         | 0.00062986 | 0.04664865 | 1.33                      | -1.65 |
| 17    | REACTOME KERATINIZATION                                                                                                   | 0.00073634 | 0.05132701 | 1.29                      | -1.65 |

|           |                                                               |                   |                 |             |             |
|-----------|---------------------------------------------------------------|-------------------|-----------------|-------------|-------------|
| 18        | REACTOME_CRISTAE_FORMATION                                    | 0.00095672        | 0.05966877      | 1.22        | -1.63       |
| 19        | REACTOME_FORMATION_OF_THE_CORNIFIED_ENVELOPE                  | 0.00094477        | 0.05966877      | 1.22        | -1.65       |
| 20        | REACTOME_GLYOXYLATE_METABOLISM_AND_GLYCINE_DEGRADATION        | 0.00115026        | 0.06815301      | 1.17        | -1.62       |
| 21        | REACTOME_CLASS_C_3_METABOTROPIC_Glutamate_Pheromone_Receptors | 0.00135993        | 0.07673876      | 1.11        | 1.49        |
| 22        | REACTOME_MOLECULES_ASSOCIATED_WITH_ELASTIC_FIBRES             | 0.00167998        | 0.09048965      | 1.04        | -1.61       |
| 23        | REACTOME_CITRIC_ACID_CYCLE_TCA_CYCLE                          | 0.00191307        | 0.09445767      | 1.02        | -1.57       |
| 24        | REACTOME_PYRUVATE_METABOLISM                                  | 0.00187531        | 0.09445767      | 1.02        | -1.59       |
| <b>25</b> | <b>REACTOME_CYTOKINE_SIGNALING_IN_IMMUNE_SYSTEM</b>           | <b>0.00243127</b> | <b>0.115242</b> | <b>0.94</b> | <b>1.44</b> |
| 26        | REACTOME_PHASE_II_CONJUGATION_OF_COMPOUNDS                    | 0.00304632        | 0.13526861      | 0.87        | -1.56       |
| 27        | REACTOME_STING_MEDIATED_INDUCION_OF_HOST_IMMUNE_RESPONSES     | 0.00308207        | 0.13526861      | 0.87        | 1.49        |

**Supplementary Table 4. Pathway enrichment analysis from KEGG dataset.** For pathways enrichment analysis, genes were ranked based on  $-\log_{10}(\text{FDR})$  values, assigning a positive or negative value depending on the direction of change. The pathway lists were obtained from the msigdb (v7.2.1) package (Hallmark, REACTOME or KEGG) and used as input for GSEA pathway enrichment analysis through the fgsea (v1.12.0) R package. Significant regulated pathways. (FDR < 0.15 and normalized enrichment score [NES] > 0). Pathways represented in **Supplementary Fig. 3c** are highlighted in bold.

| 2 dpi     |                                                                  | pval          | padj         | $-\log_{10}(\text{padj})$ | NES          |
|-----------|------------------------------------------------------------------|---------------|--------------|---------------------------|--------------|
| 1         | KEGG_SYSTEMIC_LUPUS_ERYTHEMATOSUS                                | 0.0004        | 0.07         | 1.15                      | 1.55         |
| 2         | KEGG_COMPLEMENT_AND_COAGULATION_CASCADES                         | 0.0015        | 0.14         | 0.85                      | 1.53         |
|           |                                                                  |               |              |                           |              |
| 5 dpi     |                                                                  | pval          | padj         | $-\log_{10}(\text{padj})$ | NES          |
| 1         | KEGG_ALZHEIMERS_DISEASE                                          | 0.000036      | 0.002        | 2.70                      | -1.92        |
| 2         | KEGG_HUNTINGTONS_DISEASE                                         | 0.000038      | 0.002        | 2.70                      | -1.94        |
| 3         | KEGG_OXIDATIVE_PHOSPHORYLATION                                   | 0.000031      | 0.002        | 2.70                      | -1.96        |
| 4         | KEGG_PARKINSONS_DISEASE                                          | 0.000031      | 0.002        | 2.70                      | -1.82        |
| 5         | KEGG_VALINE_LEUCINE_AND_ISOLEUCINE_DEGRADATION                   | 0.000074      | 0.003        | 2.52                      | -1.73        |
| 6         | KEGG_CITRATE_CYCLE_TCA_CYCLE                                     | 0.0001        | 0.004        | 2.40                      | -1.68        |
| 7         | KEGG_FATTY_ACID_METABOLISM                                       | 0.0002        | 0.005        | 2.30                      | -1.69        |
| 8         | KEGG_BUTANOATE_METABOLISM                                        | 0.0003        | 0.007        | 2.15                      | -1.65        |
| <b>9</b>  | <b>KEGG_CARDIAC_MUSCLE_CONTRACTION</b>                           | <b>0.0009</b> | <b>0.015</b> | <b>1.82</b>               | <b>-1.64</b> |
| 10        | KEGG_PEROXISOME                                                  | 0.0008        | 0.015        | 1.82                      | -1.64        |
| 11        | KEGG_PROPANOATE_METABOLISM                                       | 0.0007        | 0.015        | 1.82                      | -1.63        |
| 12        | KEGG_GLYCOLYSIS_GLUONEOGENESIS                                   | 0.0018        | 0.027        | 1.57                      | -1.62        |
| 13        | KEGG_PYRUVATE_METABOLISM                                         | 0.0025        | 0.036        | 1.44                      | -1.6         |
| 14        | KEGG_SULFUR_METABOLISM                                           | 0.0039        | 0.052        | 1.28                      | -1.49        |
| 15        | KEGG_ALLOGRAFT_REJECTION                                         | 0.0082        | 0.073        | 1.14                      | 1.53         |
| 16        | KEGG_AMINOACYL_TRNA_BIOSYNTHESIS                                 | 0.0073        | 0.073        | 1.14                      | -1.55        |
| 17        | KEGG_AUTOIMMUNE_THYROID_DISEASE                                  | 0.0079        | 0.073        | 1.14                      | 1.54         |
| 18        | KEGG_CELL_ADHESION_MOLECULES_CAMS                                | 0.0083        | 0.073        | 1.14                      | 1.61         |
| 19        | KEGG_CYTOSOLIC_DNA_SENSING_PATHWAY                               | 0.0068        | 0.073        | 1.14                      | 1.58         |
| 20        | KEGG_NATURAL_KILLER_CELL_MEDIATED_CYTOTOXICITY                   | 0.0072        | 0.073        | 1.14                      | 1.63         |
| 21        | KEGG_NEUROACTIVE_LIGAND_RECEPTOR_INTERACTION                     | 0.0082        | 0.073        | 1.14                      | 1.6          |
| 22        | KEGG_GRAFT_VERSUS_HOST_DISEASE                                   | 0.0101        | 0.081        | 1.09                      | 1.53         |
| 23        | KEGG_T_CELL_RECEPTOR_SIGNALING_PATHWAY                           | 0.01          | 0.081        | 1.09                      | 1.58         |
| <b>24</b> | <b>KEGG_ARRHYTHMOGENIC_RIGHT_VENTRICULAR_CARDIOMYOPATHY_ARVC</b> | <b>0.0134</b> | <b>0.083</b> | <b>1.08</b>               | <b>-1.47</b> |
| 25        | KEGG_B_CELL_RECEPTOR_SIGNALING_PATHWAY                           | 0.0121        | 0.083        | 1.08                      | 1.55         |
| 26        | KEGG_CHEMOKINE_SIGNALING_PATHWAY                                 | 0.0135        | 0.083        | 1.08                      | 1.54         |
| 27        | KEGG_PPAR_SIGNALING_PATHWAY                                      | 0.0109        | 0.083        | 1.08                      | -1.49        |
| 28        | KEGG_RIBOSOME                                                    | 0.0132        | 0.083        | 1.08                      | -1.46        |
| 29        | KEGG_SYSTEMIC_LUPUS_ERYTHEMATOSUS                                | 0.012         | 0.083        | 1.08                      | 1.55         |

|           |                                                 |               |              |             |             |
|-----------|-------------------------------------------------|---------------|--------------|-------------|-------------|
| <b>30</b> | <b>KEGG_VIRAL_MYOCARDITIS</b>                   | <b>0.0133</b> | <b>0.083</b> | <b>1.08</b> | <b>1.54</b> |
| 31        | KEGG_FC_GAMMA_R_MEDIATED_PHAGOCYTOSIS           | 0.0143        | 0.085        | 1.07        | 1.53        |
| 32        | KEGG_VALINE_LEUCINE_AND_ISOLEUCINE_BIOSYNTHESIS | 0.0158        | 0.091        | 1.04        | -1.42       |
| 33        | KEGG_BETA_ALANINE_METABOLISM                    | 0.0182        | 0.102        | 0.99        | -1.48       |
| 34        | KEGG_BASAL_CELL_CARCINOMA                       | 0.0199        | 0.105        | 0.98        | -1.46       |
| 35        | KEGG_RNA_POLYMERASE                             | 0.02          | 0.105        | 0.98        | -1.48       |
| 36        | KEGG_LYSINE_DEGRADATION                         | 0.0246        | 0.126        | 0.90        | -1.46       |
| 37        | KEGG_TOLL_LIKE_RECEPTOR_SIGNALING_PATHWAY       | 0.026         | 0.129        | 0.89        | 1.47        |
| 38        | KEGG_PRIMARY_IMMUNODEFICIENCY                   | 0.028         | 0.132        | 0.88        | 1.46        |
| 39        | KEGG_RIG_I_LIKE_RECEPTOR_SIGNALING_PATHWAY      | 0.0279        | 0.132        | 0.88        | 1.47        |
| 40        | KEGG_JAK_STAT_SIGNALING_PATHWAY                 | 0.0292        | 0.134        | 0.87        | 1.44        |
| 41        | KEGG_CELL_CYCLE                                 | 0.0308        | 0.137        | 0.86        | 1.43        |
| 42        | KEGG_TRYPTOPHAN_METABOLISM                      | 0.0312        | 0.137        | 0.86        | -1.44       |
| 43        | KEGG_CALCIIUM_SIGNALING_PATHWAY                 | 0.0324        | 0.139        | 0.86        | -1.31       |
